# Supplementary material for: Suppression of voltage-decay in Li2MnO3 cathode via reconstruction of layered-spinel coexisting phases
Source: Royal Society of Chemistry journal article supplement (doi:10.1039/d0ta05101b), 2020-01-01
Supplement: d0ta05101b1.pdf [file d0ta05101b1.pdf]

## Supplementary Information

### Suppression of Voltage-Decay in $\text{Li}_2\text{MnO}_3$ Cathode via Re-construction of Layered-Spinel Coexist Phases

Jue Wu<sup>1,2</sup>, Zehao Cui<sup>1</sup>, Jinpeng Wu<sup>2</sup>, Yuxuan Xiang<sup>1</sup>, Haodong Liu<sup>3</sup>, Shiyao Zheng<sup>1</sup>, Wanli  
Yang<sup>2</sup>, Yong Yang<sup>1,4\*</sup>

1 State Key Laboratory for Physical Chemistry of Solid Surfaces, Collaborative Innovation Center of  
Chemistry for Energy Materials, Department of Chemistry, College of Chemistry and Chemical  
Engineering, Xiamen University, Xiamen 361005, China.

2 Advanced Light Source, Lawrence Berkeley National Laboratory, One Cyclotron Road, Berkeley,  
California 94720, USA.

3 Department of NanoEngineering, University of California San Diego, La Jolla, California 92093, USA.

4 School of Energy Research, Xiamen University, Xiamen 361005, China.

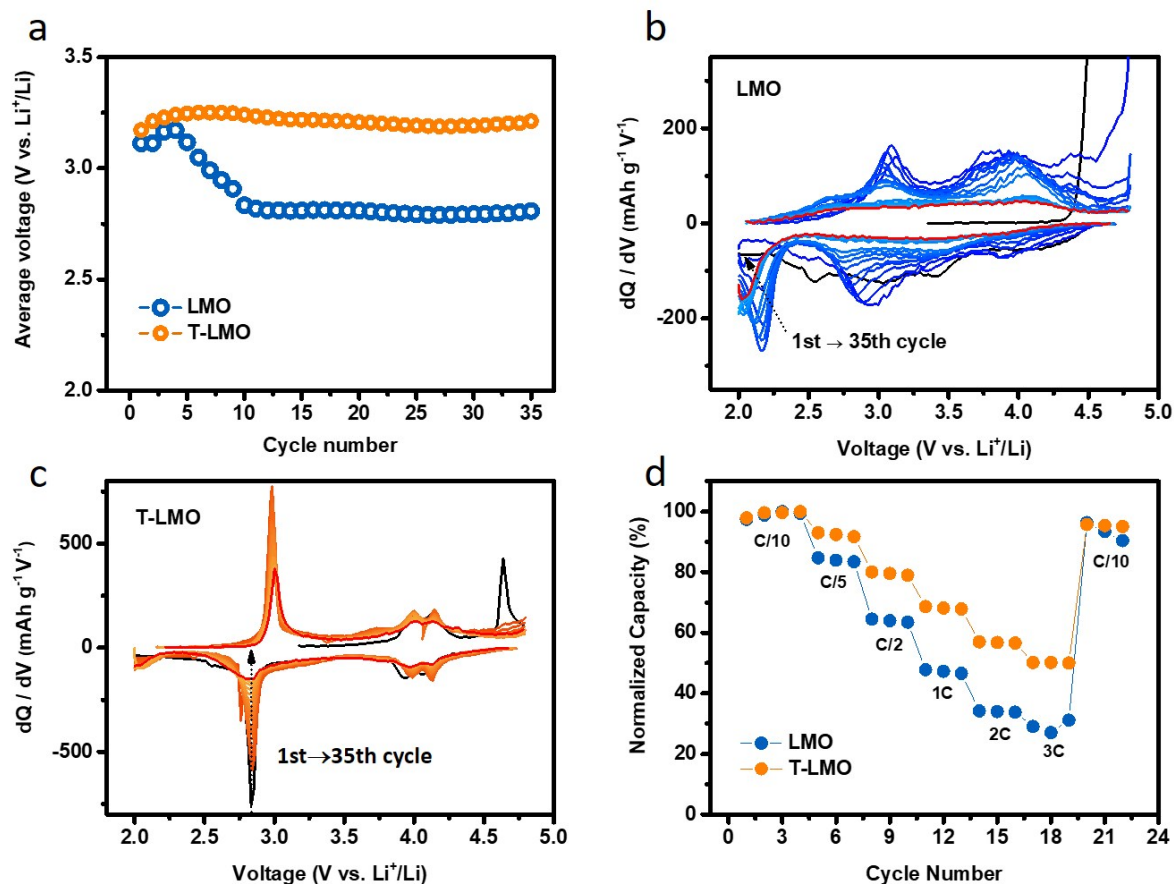

**Supplementary Figure 1.** (a) The average voltage evolution during cycling for pristine and treated LMO. The average voltage during discharge is obtained via dividing the total energy density by the total discharge capacity measured in the working voltage range between 2.0 V and 4.8 V. (b) The  $dQ/dV$  plots for LMO. (c) The  $dQ/dV$  plots for T-LMO. (d) The rate capacities for pristine and treated LMO.

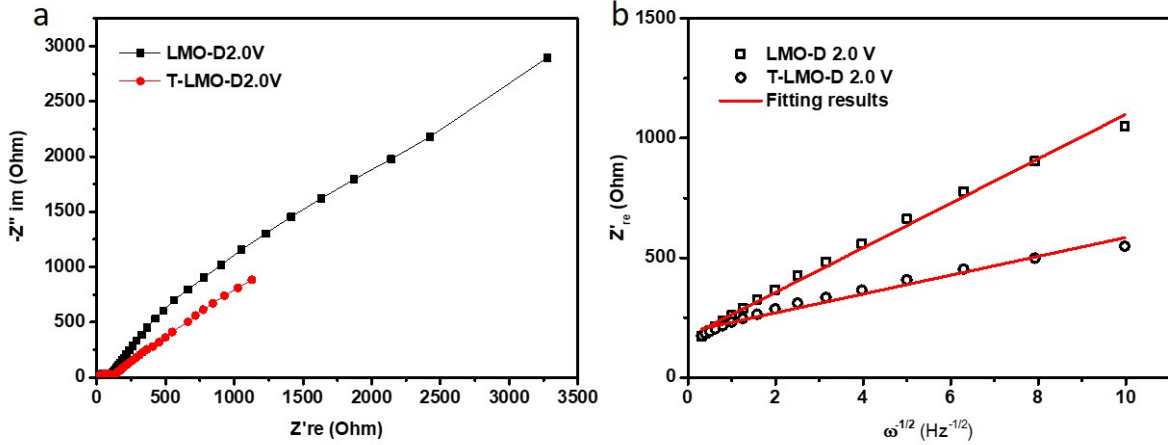

**Supplementary Figure 2.** (a) Nyquist plots of cells with LMO and T-LMO electrodes after initially charged and discharged to 2.0 V. (b) The profiles of  $Z'_{Re}$  vs.  $\omega^{-1/2}$  from 0.1 Hz to 0.01 Hz after initially charged and discharged to 2.0 V. The diffusion coefficient  $D_{Li^+}$  has been proved being inversely proportional to the slope of the line in (b).<sup>1,2</sup>

The  $Li^+$  diffusion coefficient can be gained according to the following equation<sup>1,2,3</sup>:

$$D_{Li^+} = \frac{R^2 T^2}{2A^2 n^4 F^4 C^2 \sigma^2}$$

where  $D_{Li^+}$  represents the diffusion coefficient of Li ions,  $R$  is the gas constant,  $T$  is the absolute temperature,  $A$  is the surface area of electrode,  $n$  is the number of charges on the Li ion per molecule during oxidization,  $F$  is the Faraday constant,  $C$  is the concentration of Li ion, and  $\sigma$  the Warburg factor,  $\sigma$  relates to  $Z'_{Re}$  through the following equation:

$$Z'_{Re} = R_D + R_l + \sigma \omega^{-1/2}$$

Therefore, the value of  $D_{Li^+}$  is inversely proportional to the Warburg factor,  $\sigma$ , that is the slope of the line in Figure S2b. From the results, T-LMO sample shows decreased slope of fitting line, indicating the enhanced  $Li^+$  diffusion coefficient compared with that of pristine LMO. The slope of fitting line for T-LMO and LMO is 93.0 and 39.4. Therefore, the  $D_{Li^+}$  for T-LMO is at least five times higher than that of LMO.

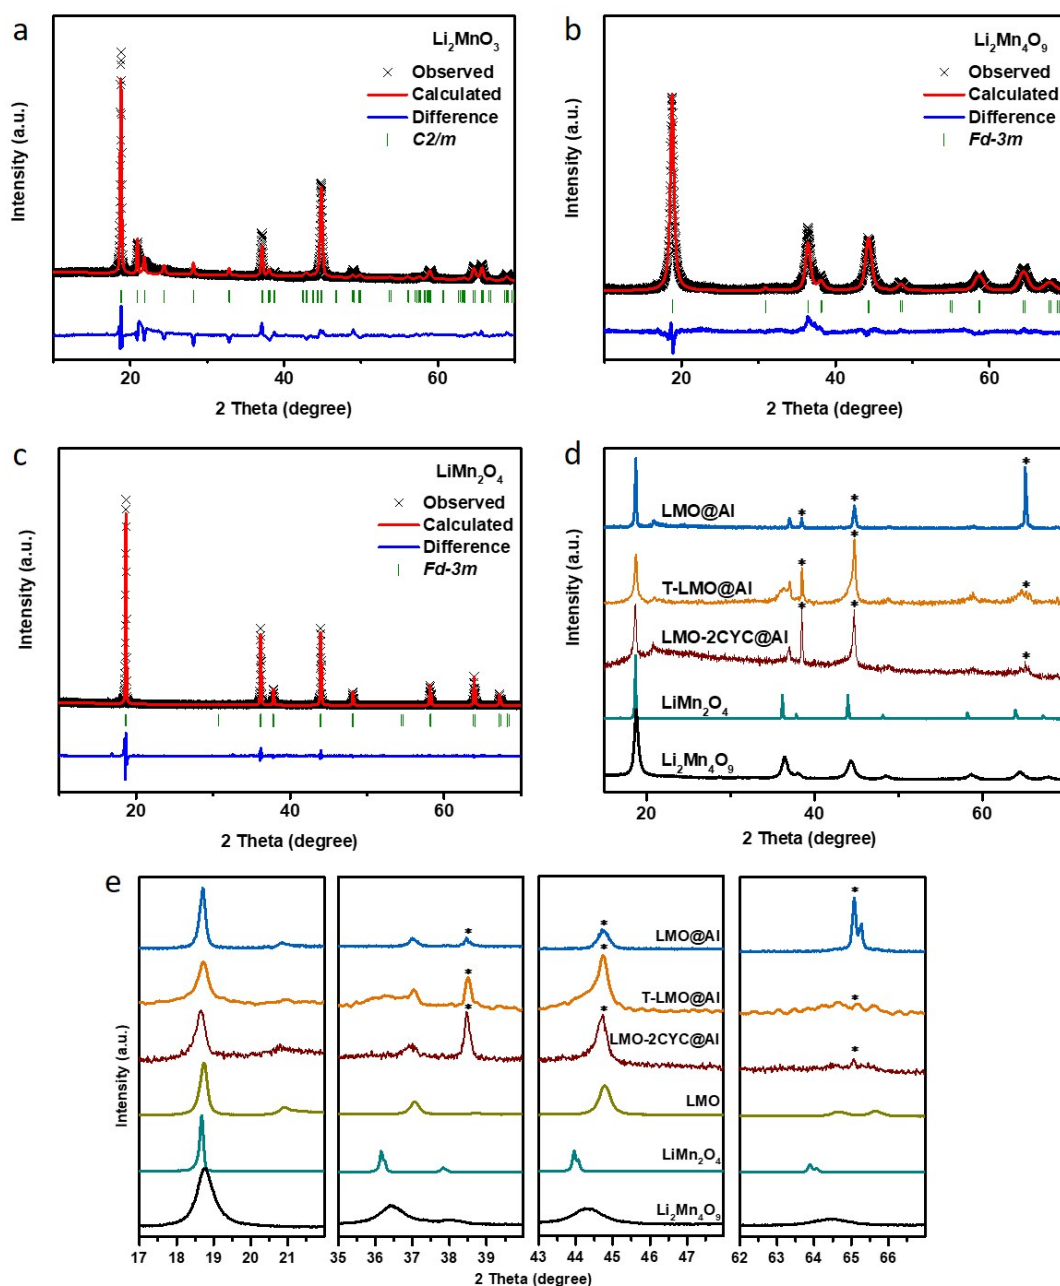

**Supplementary Figure 3.** The XRD patterns and Rietveld refinement for (a) pristine LMO (b)  $\text{Li}_2\text{Mn}_4\text{O}_9$  and (c)  $\text{LiMn}_2\text{O}_4$ . The refinement parameters are in Table S1. (d) The comparison of XRD patterns and (e) enlarged profiles. The electrode samples in (d) and (e) were scraped from the electrode collector with residual aluminum powder, which is assigned as asterisk. For LMO, the peak at around  $21^\circ$  comes from Li/Mn order and stacking fault, which is excluded during refinement.<sup>4</sup> The defect spinel  $\text{Li}_2\text{Mn}_4\text{O}_9$  can be described as  $\text{Li}_{0.89}\square_{0.11}[\text{Mn}_{1.78}\square_{0.22}]\text{O}_4$ .<sup>5</sup>

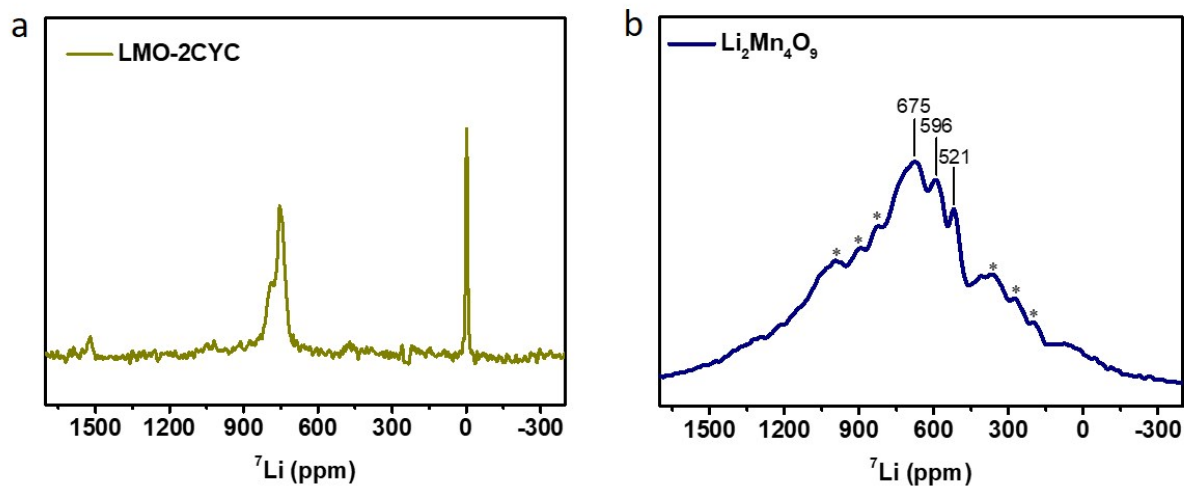

**Supplementary Figure 4.** (a)  $^7\text{Li}$  pjMATPASS spectra for two cycled LMO material and (b)  $^7\text{Li}$  NMR spectra for  $\text{Li}_2\text{Mn}_4\text{O}_9$  material. The asterisk indicates spinning sidebands, which is consistent with previous result.<sup>6</sup>

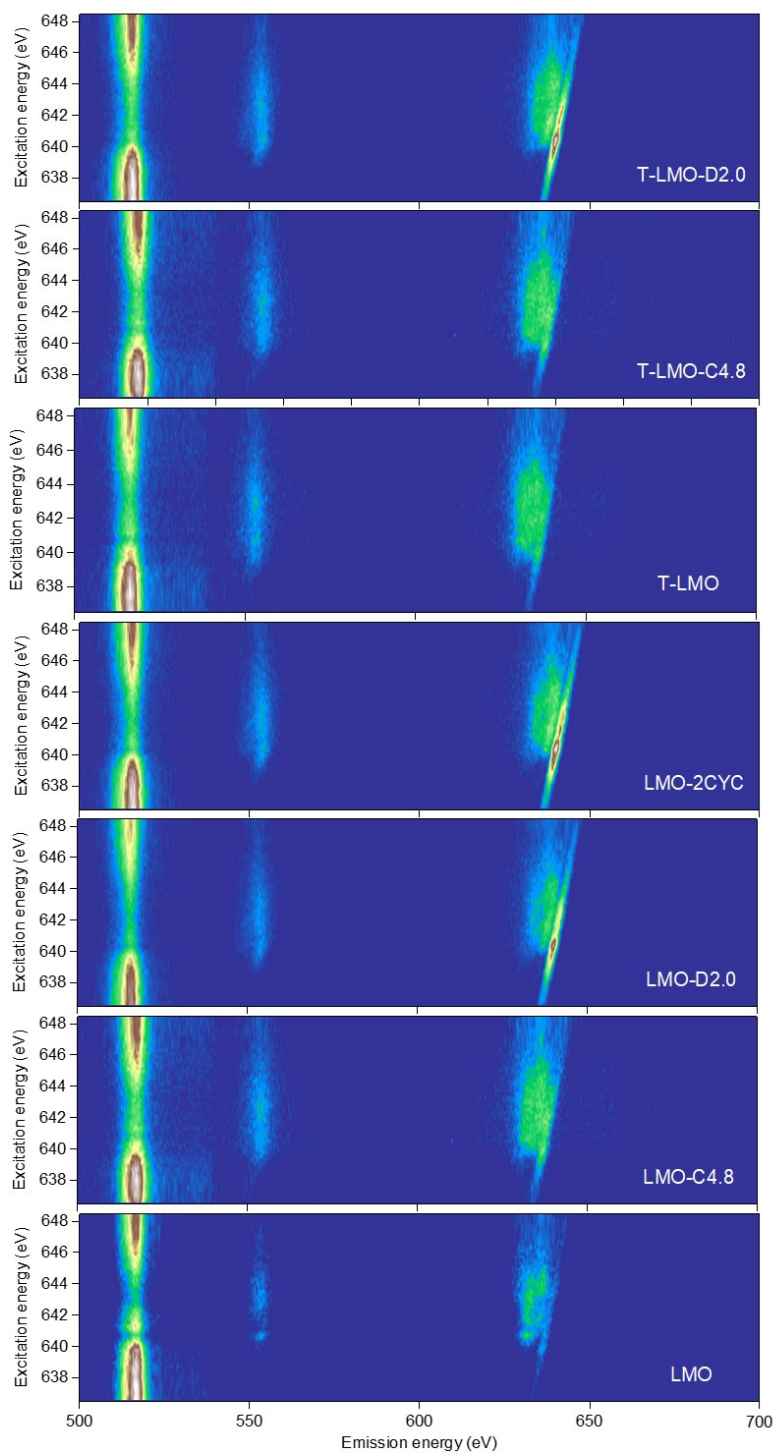

**Supplementary Figure 5.** The original Mn-L mRIXS for LMO series samples.

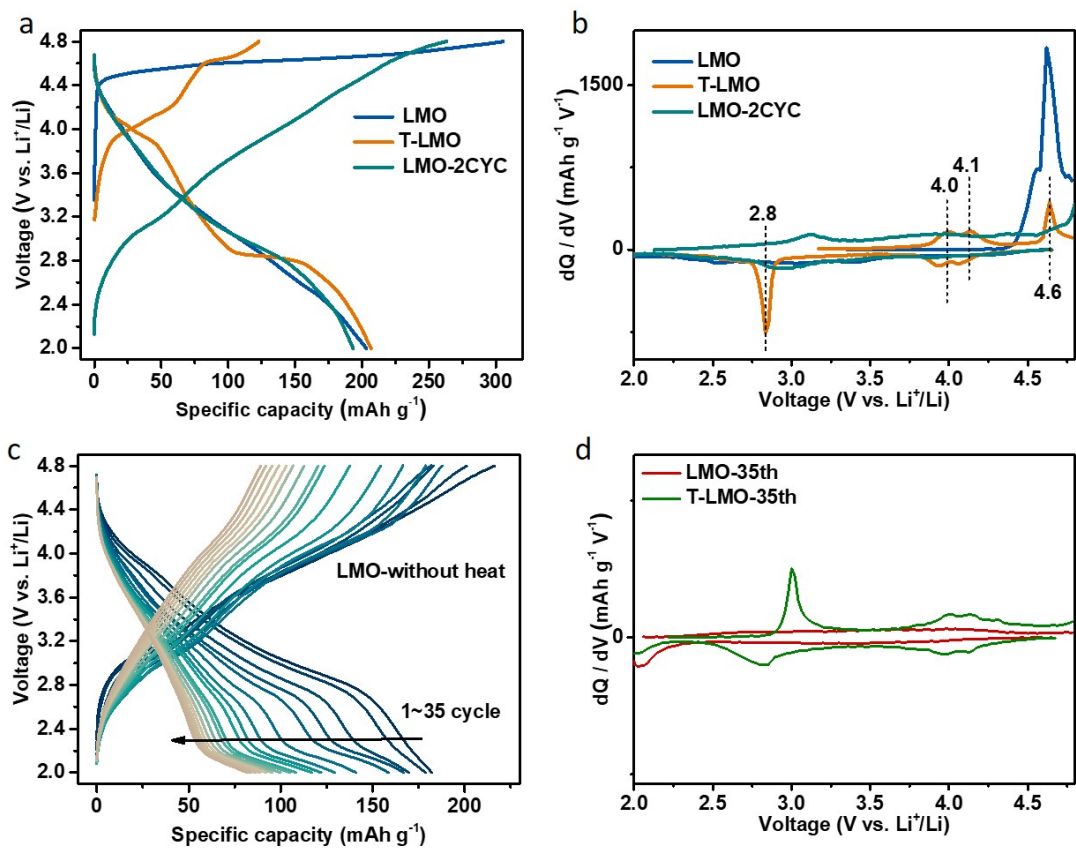

**Supplementary Figure 6.** (a) The charge-discharge curves and (b) dQ/dV plots for pristine LMO in the initial cycle, second cycle and treated LMO in the initial cycle. (c) The cycling curves of LMO cycled twice and without thermal treatment. (d) dQ/dV plots for pristine LMO and T-LMO in the 35th cycle.

**Supplementary Table 1.** Refined crystallographic parameters of the XRD patterns.**LMO**Space group: *C2/m*.Lattice parameters:  $a=4.9321(61)$  Å,  $b=8.5300(25)$  Å,  $c=5.0225(06)$  Å,  $\alpha=90.000(0)^\circ$ ,  $\beta=109.138(9)^\circ$ ,  $\gamma=90.000(0)^\circ$ .Agreement factors:  $R_{wp}=10.0$  %,  $R_p=6.5$  %,  $\chi^2=5.67$ .

| Atom | x      | y      | z      | Multiplicity | Occupancy | Uiso    |
|------|--------|--------|--------|--------------|-----------|---------|
| Mn1  | 0.0000 | 0.1748 | 0.0000 | 4            | 1.0000    | 0.00500 |
| Li1  | 0.0000 | 0.5000 | 0.0000 | 2            | 1.0000    | 0.00500 |
| Li2  | 0.0000 | 0.0000 | 0.5000 | 2            | 1.0000    | 0.00500 |
| Li3  | 0.0000 | 0.6617 | 0.5000 | 4            | 1.0000    | 0.00500 |
| O1   | 0.2773 | 0.0000 | 0.1728 | 4            | 1.0000    | 0.00500 |
| O2   | 0.2647 | 0.3313 | 0.2267 | 8            | 1.0000    | 0.00500 |

**Li<sub>2</sub>Mn<sub>4</sub>O<sub>9</sub>**Space group: *Fd-3m*.Lattice parameters:  $a=8.1698(20)$  Å,  $b=8.1698(20)$  Å,  $c=8.1698(20)$  Å,  $\alpha=90.000(0)^\circ$ ,  $\beta=90.000(0)^\circ$ ,  $\gamma=90.000(0)^\circ$ .Agreement factors:  $R_{wp}=14.5$  %,  $R_p=12.4$  %,  $\chi^2=10.23$ .

| Atom | x      | y      | z      | Multiplicity | Occupancy | Uiso    |
|------|--------|--------|--------|--------------|-----------|---------|
| Li1  | 0.1250 | 0.1250 | 0.1250 | 8            | 0.8800    | 0.00500 |
| Mn1  | 0.5000 | 0.5000 | 0.5000 | 16           | 0.8817    | 0.00500 |
| O2   | 0.2673 | 0.2673 | 0.2673 | 32           | 1.0000    | 0.00500 |

**LiMn<sub>2</sub>O<sub>4</sub>**Space group: *Fd-3m*.Lattice parameters:  $a=8.2415(26)$  Å,  $b=8.2415(26)$  Å,  $c=8.2415(26)$  Å,  $\alpha=90.000(0)^\circ$ ,  $\beta=90.000(0)^\circ$ ,  $\gamma=90.000(0)^\circ$ .Agreement factors:  $R_{wp}=14.8$  %,  $R_p=10.5$  %,  $\chi^2=8.299$ .

| Atom | x      | y      | z      | Multiplicity | Occupancy | Uiso    |
|------|--------|--------|--------|--------------|-----------|---------|
| Li1  | 0.0000 | 0.5000 | 0.0000 | 2            | 1.0000    | 0.00500 |
| Mn1  | 0.0000 | 0.1748 | 0.0000 | 4            | 1.0000    | 0.00500 |
| O2   | 0.2647 | 0.3313 | 0.2267 | 8            | 1.0000    | 0.00500 |



**Supplementary Table 2.** The percentage distribution and average value of manganese valence by fitting the Mn-*L* iPFY spectra.

| <b>Sample</b>     | <b>Mn<sup>2+</sup> (%)</b> | <b>Mn<sup>3+</sup> (%)</b> | <b>Mn<sup>4+</sup> (%)</b> | <b>Average valence</b> |
|-------------------|----------------------------|----------------------------|----------------------------|------------------------|
| <b>LMO</b>        | 0.0                        | 0.0                        | 100.0                      | 4.00                   |
| <b>LMO-C4.8</b>   | 3.7                        | 8.1                        | 88.2                       | 3.85                   |
| <b>LMO-D2.0</b>   | 15.0                       | 53.1                       | 31.9                       | 3.17                   |
| <b>LMO-2CYC</b>   | 17.3                       | 68.6                       | 14.1                       | 2.97                   |
| <b>T-LMO</b>      | 0.0                        | 25.5                       | 74.5                       | 3.75                   |
| <b>T-LMO-C4.8</b> | 0.5                        | 9.0                        | 90.5                       | 3.90                   |
| <b>T-LMO-D2.0</b> | 14.7                       | 54.5                       | 30.8                       | 3.16                   |

## References

1. D. Luo, G. Li, C. Fu, J. Zheng, J. Fan, Q. Li and L. Li, *Adv. Energy Mater.*, 2014, **4**, 1400062.
2. B. Qiu, M. Zhang, L. Wu, J. Wang, Y. Xia, D. Qian, H. Liu, S. Hy, Y. Chen, K. An, Y. Zhu, Z. Liu and Y. S. Meng, *Nat. Commun.*, 2016, **7**, 12108.
3. X. Zhang, D. Luo, G. Li, J. Zheng, C. Yu, X. Guan, C. Fu, X. Huang and L. Li, *J. Mater. Chem. A*, 2013, **1**, 9721-9729.
4. K. Kubota, T. Kaneko, M. Hirayama, M. Yonemura, Y. Imanari, K. Nakane and R. Kanno, *J. Power Sources*, 2012, **216**, 249-255.
5. M. M. Thackeray, A. Dekock, M. H. Rossouw, D. Liles, R. Bittihn and D. Hoge, *J. Electrochem. Soc.*, 1992, **139**, 363-366.
6. Y. J. Lee, F. Wang and C. P. Grey, *J. Am. Chem. Soc.*, 1998, **120**, 12601-12613.
